# Supplementary material for: Performance Evaluation of Selenite (SeO32−) Reduction by Enterococcus spp.
Source: MDPI journal article supplement (doi:10.3390/catal11091024), 2021-08-24
Supplement: s1 [file s1]

## SUPPLEMENTARY MATERIAL

### Performance Evaluation of Selenite ( $\text{SeO}_3^{2-}$ ) Reduction by *Enterococcus spp*

Job T. Tendenedzai, Evans M.N. Chirwa and Hendrik G. Brink\*

Water Utilisation and Environmental Engineering Division, Department of Chemical Engineering, University of Pretoria; Pretoria 0002, South Africa.

\*deon.brink@up.ac.za

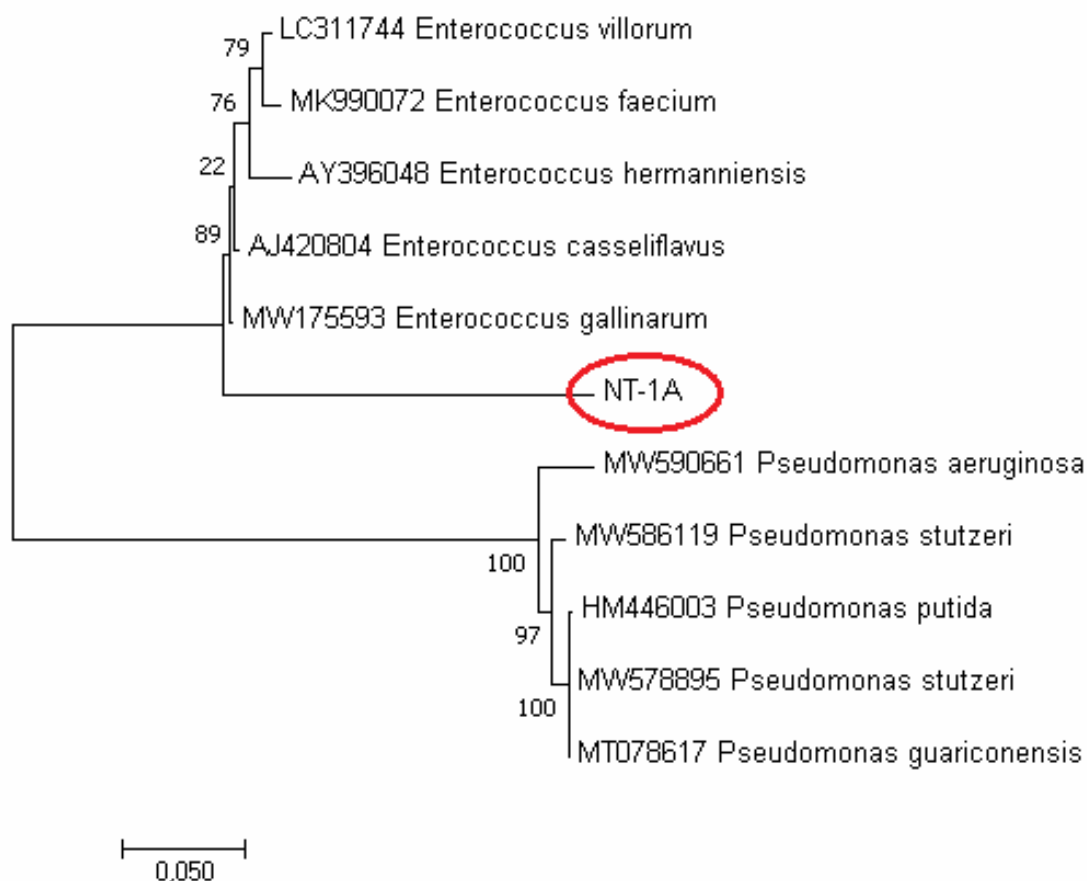

Figure S1: Phylogenetic tree for the microbial culture results

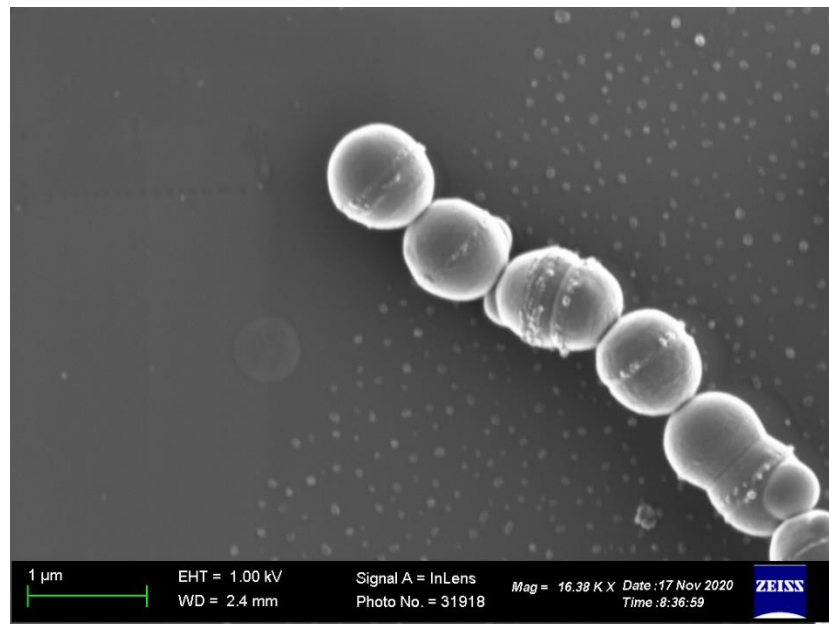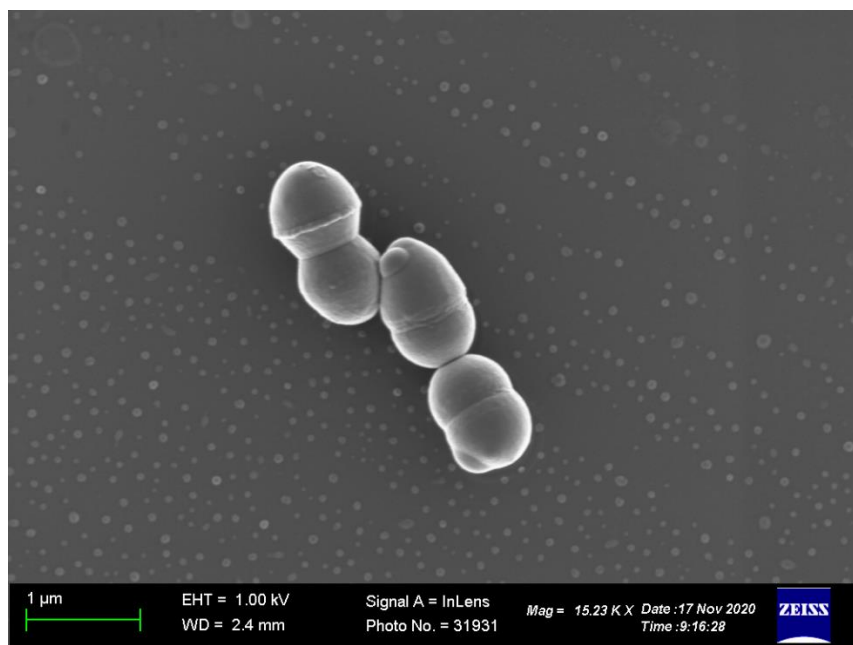

**Figure S2:** SEM micrographs depicting the morphology of *Enterococcus spp*

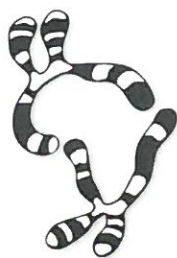

inqaba biotec™

Africa's Genomics Company

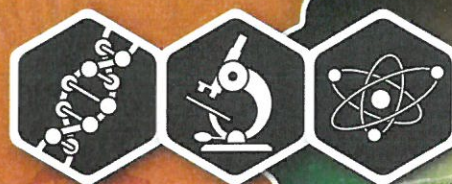

## 16S REPORT

|                     |                                          |
|---------------------|------------------------------------------|
| Client's Name:      | Job Tendenedzai                          |
| Institute:          | University of Pretoria                   |
| Client's Address:   |                                          |
| Report Compiled By: | Inqaba Biotechnical Industries Pty (Ltd) |

### BACKGROUND:

Some bacterial isolates cannot be taxonomically identified from phenotypic characteristics. Bacterial isolates can be characterised by sequencing the 16S rDNA. The universal primers 27F and 1492R are used to amplify the 16S target region (Lane et al 1991; Turner et al 1999).

### MATERIAL AND METHODS:

Genomic DNA was extracted from the cultures received using the Quick-DNA™ Fungal/Bacterial Miniprep Kit (Zymo Research, Catalogue No. D6005). The 16S target region was amplified using OneTaq® Quick-Load® 2X Master Mix (NEB, Catalogue No. M0486) with the primers presented in Table 1. The PCR products were run on a gel and gel extracted with the Zymoclean™ Gel DNA Recovery Kit (Zymo Research, Catalogue No. D4001). The extracted fragments were sequenced in the forward and reverse direction (Nimagen, BrilliantDye™ Terminator Cycle Sequencing Kit V3.1, BRD3-100/1000) and purified (Zymo Research, ZR-96 DNA Sequencing Clean-up Kit™, Catalogue No. D4050). The purified fragments were analysed on the ABI 3500xl Genetic Analyzer (Applied Biosystems, ThermoFisher Scientific) for each reaction for every sample, as listed in Section 1. CLC Bio Main Workbench v7.6 was used to analyse the .ab1 files generated by the ABI 3500XL Genetic Analyzer and results were obtained by a BLAST search (NCBI).

BLASTN 2.2.31+

Reference: Stephen F. Altschul, Thomas L. Madden, Alejandro A. Sch&auml;ffer, Jinghui Zhang, Zheng Zhang, Webb Miller, and David J. Lipman (1997), "Gapped BLAST and PSI-BLAST: a new generation of protein database search programs", Nucleic Acids Res. 25:3389-3402.

Table 1: 16S Primers sequences

| Name of Primer | Target            | Sequence (5' to 3')  |
|----------------|-------------------|----------------------|
| 16S-27F        | 16S rDNA sequence | AGAGTTTGATCMTGGCTCAG |
| 16S-1492R      | 16S rDNA sequence | CGGTTACCTTGTTACGACTT |

It is the sender's responsibility to ensure the correctness of the information accompanying the sent samples. Inqaba Biotechnical Industries (Pty) Ltd. warrants this test results to be accurate for the sample received. In no event shall Inqaba Biotechnical Industries (Pty) Ltd. be held liable for indirect, substantial or secondary damages of any kind.

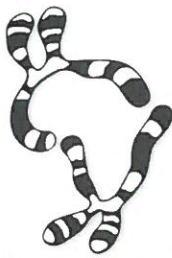

inqaba biotec™

Africa's Genomics Company

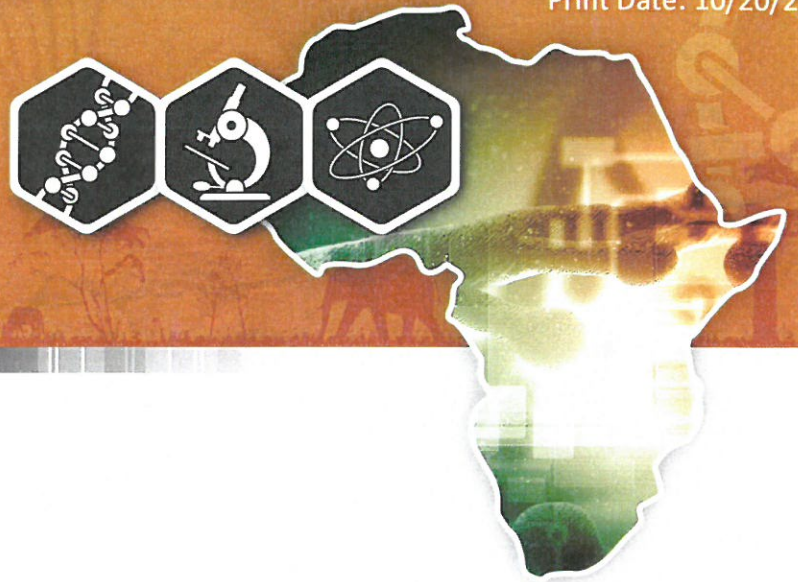**16S REPORT****RESULTS:**

Figure 1: A photographic image of an agarose gel indicating the amplification of the 16S target region.

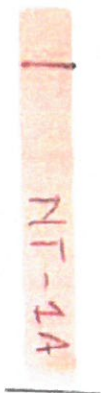

It is the sender's responsibility to ensure the correctness of the information accompanying the sent samples. Inqaba Biotechnical Industries (Pty) Ltd. warrants this test results to be accurate for the sample received. In no event shall Inqaba Biotechnical Industries (Pty) Ltd. be held liable for indirect, substantial or secondary damages of any kind.

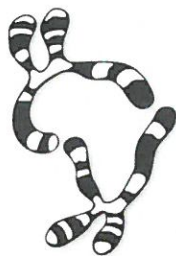

inqaba biotec™

Africa's Genomics Company

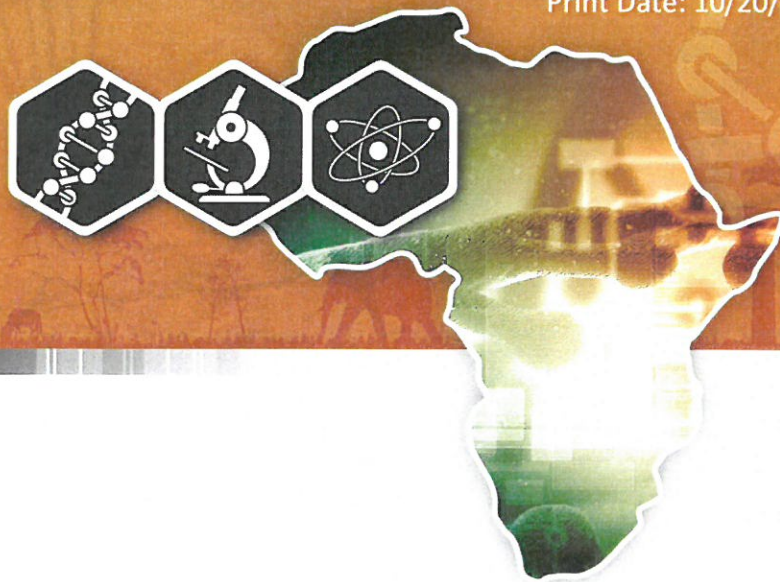**16S REPORT****RESULTS:**

BLAST: The BLAST results correspond to the similarity between the sequence queried and the biological sequences within the NCBI database.

|                    |                                                                   |
|--------------------|-------------------------------------------------------------------|
| Name of sample     | NT-1A                                                             |
| Request ID         | SK65N3FT014                                                       |
| Predicted Organism | <i>Enterococcus hermanni</i> nsis, <i>Enterococcus gallinarum</i> |
| GenBank Accession  | AY396048.1, CP050485.1                                            |

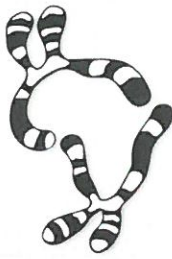

inqaba biotec™

Africa's Genomics Company

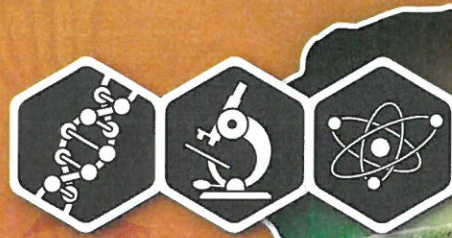**16S REPORT****CONCLUSION:**

| Name of sample | BLAST prediction                                                   |
|----------------|--------------------------------------------------------------------|
| NT-1A          | <i>Enterococcus hermanniensis</i> , <i>Enterococcus gallinarum</i> |

Dr Simon Lashmar  
Genomics Scientist

20/10/2020

Date

Dr Erika Viljoen  
Genomics Scientist

20/10/2020

Date
